# Supplementary material for: A prospective study on quality in endoscopic retrograde cholangiopancreatography (ERCP): trend in Italy from the REQUEST study
Source: PubMed Central journal article supplement — Endosc Int Open. 2021 Sep 16;9(10):E1563–71. doi: 10.1055/a-1531-4691 (PMC8445684; doi:10.1055/a-1531-4691), 2021-09-16
Supplement: 2345supmat_10-1055-a-1531-4691.pdf [file 2345supmat_10-1055-a-1531-4691.pdf]

## Supplementary material

**Supplementary Table 1** Experience and training of the study operators.

| <b>Experienced operators</b>                                      |                       |                             |                               |                |
|-------------------------------------------------------------------|-----------------------|-----------------------------|-------------------------------|----------------|
|                                                                   | <b>Total (n = 41)</b> | <b>High-volume (n = 25)</b> | <b>Medium-volume (n = 16)</b> | <b>P value</b> |
| <b>Lifetime ERCPs performed independently, n (%)</b>              |                       |                             |                               | 0.906          |
| ≤ 100                                                             | 2 (2,4)               | 1 (4,0)                     | 1 (6,3)                       |                |
| 101-300                                                           | 4 (9,8)               | 3 (12,0)                    | 1 (6,3)                       |                |
| 301-500                                                           | 2 (4,9)               | 1 (4,0)                     | 1 (6,3)                       |                |
| 501-1000                                                          | 2 (4,9)               | 1 (4,0)                     | 1 (6,3)                       |                |
| > 1000                                                            | 32 (78,0)             | 19 (76,0)                   | 13 (81,2)                     |                |
| <b>ERCPs performed independently in the last year, n (%)</b>      |                       |                             |                               | 0.003          |
| < 100                                                             | 7 (17,1)              | 5 (20,0)                    | 2 (12,5)                      |                |
| 101-200                                                           | 20 (48,7)             | 7 (40,0)                    | 13 (81,3)                     |                |
| ≥ 200                                                             | 14 (34,1)             | 13 (52,0)                   | 1 (6,3)                       |                |
| <b>ERCPs performed independently in the last year, n (%)</b>      |                       |                             |                               | 0.003          |
| ≤ 200                                                             | 27 (65,9)             | 12 (48,0)                   | 15 (93,8)                     |                |
| > 200                                                             | 14 (34,1)             | 13 (52,0)                   | 1 (6,2)                       |                |
| <b>Number of years performing ERCP independently median (IQR)</b> | 16 (10-34)            | 14 (7-25)                   | 17 (13-20)                    | 0.793          |
| <b>The time for ERCP training n (%)</b>                           |                       |                             |                               | 0.756          |
| during residency                                                  | 13 (31,7)             | 7 (28,0)                    | 6 (37,5)                      |                |
| after residency                                                   | 11 (26,8)             | 8 (32,0)                    | 3 (18,8)                      |                |
| Hospital work experience                                          | 17 (41,5)             | 10 (40,0)                   | 7 (43,8)                      |                |
| <b>Number of tutored ERCPs before independent procedure</b>       |                       |                             |                               | 0.324          |
| 0                                                                 | 4 (9,8)               | 1 (4,0)                     | 3 (19,0)                      |                |
| < 50                                                              | 7 (17,1)              | 4 (16,0)                    | 3 (19,0)                      |                |
| 50-100                                                            | 11 (26,9)             | 7 (28,0)                    | 4 (25,0)                      |                |
| 100-200                                                           | 8 (19,5)              | 4 (16,0)                    | 4 (25,0)                      |                |
| > 200                                                             | 11 (26,9)             | 9 (36,0)                    | 2 (12,5)                      |                |
| <b>Trainees</b>                                                   |                       |                             |                               |                |
|                                                                   | <b>Total (n = 21)</b> | <b>High-volume (n = 12)</b> | <b>Medium-volume (n = 9)</b>  | <b>P value</b> |
| <b>Number of years being in ERCP training</b>                     |                       |                             |                               |                |

## Supplementary material

|                                      |               |               |               |       |
|--------------------------------------|---------------|---------------|---------------|-------|
| median (IQR), year                   | 1.0 (1.0-3.0) | 1.0 (1.0-2.0) | 1.0 (1.0-3.0) | 0.806 |
| <b>Number of ERCP as trainee</b>     |               |               |               | 0.042 |
| ≤ 50                                 | 15 (71.4)     | 6 (50.0)      | 9 (100)       |       |
| 50-100                               | 0 (0.0)       | 0 (0.0)       | 0 (0.0)       |       |
| 101-200                              | 3 (14.3)      | 3 (25.0)      | 0 (0.0)       |       |
| 200-300                              | 3 (14.3)      | 3 (25.0)      | 0 (0.0)       |       |
| <b>Time for ERCP training, n (%)</b> |               |               |               | 0.478 |
| During residency                     | 4 (19.0)      | 3 (25.0)      | 1 (11.1)      |       |
| After residency                      | 4 (19.0)      | 2 (16.7)      | 2 (22.2)      |       |
| Hospital work experience             | 13 (62.0)     | 7 (58.3)      | 6 (66.7)      |       |

## Supplementary material

**Supplementary Table 2** Results from univariable analysis for post-ERCP adverse events.\*

| Variable                                                         |                |          | Univariate regression analysis<br>adjusted for cluster<br>(hospital) effect |         |
|------------------------------------------------------------------|----------------|----------|-----------------------------------------------------------------------------|---------|
|                                                                  | Without<br>AEs | With AEs | ORs [95% CI]                                                                | P value |
| Center group                                                     |                |          |                                                                             |         |
| High-volume                                                      | 544<br>(92.4)  | 45 (7.6) | 1<br>1.20<br>(0.42-3.40)                                                    | 0.72    |
| Low-volume                                                       | 45 (91.0)      | 16 (9.0) |                                                                             |         |
| Age, n (%)                                                       |                |          |                                                                             |         |
| > 40 years                                                       | 682<br>(92.3)  | 57 (7.7) | 1<br>2.10<br>(0.66-6.43)                                                    | 0.204   |
| < 40 years                                                       | 23 (85.2)      | 4 (14.8) |                                                                             |         |
| Sex, n (%)                                                       |                |          |                                                                             |         |
| Female                                                           | 269<br>(91.5)  | 25 (8.5) | 1<br>0.83<br>(0.46-1.37)                                                    | 0.461   |
| Male                                                             | 437<br>(92.6)  | 35 (7.4) |                                                                             |         |
| Prior history of pancreatitis                                    |                |          |                                                                             |         |
| No                                                               | 666<br>(92.2)  | 55 (7.8) | 1<br>1.52<br>(0.56-4.14)                                                    | 0.409   |
| Yes                                                              | 39 (90.0)      | 5 (10.0) |                                                                             |         |
| Prior history of ERCP                                            |                |          |                                                                             |         |
| Yes                                                              | 270<br>(94.4)  | 16 (5.6) | 1<br>1.71<br>(0.64-4.50)                                                    | 0.281   |
| No                                                               | 435<br>(90.8)  | 44 (9.2) |                                                                             |         |
| ASA Classification (reference<br>group, I)                       |                |          |                                                                             |         |
| I                                                                | 115<br>(95.8)  | 5 (4.2)  | 1<br>2.14<br>(0.96-4.76)                                                    | 0.062   |
| ≥ II                                                             | 591<br>(91.5)  | 55 (8.5) |                                                                             |         |
| Indication for ERCP -<br>recurrent/acute/chronic<br>pancreatitis |                |          |                                                                             |         |
| Other indications                                                | 644<br>(93.1)  | 48 (7.1) | 1                                                                           |         |

## Supplementary material

|                                                            |            |           |                    |       |
|------------------------------------------------------------|------------|-----------|--------------------|-------|
| Recurrent/acute/chronic pancreatitis                       | 62 (83.8)  | 12 (16.2) | 2.60 (1.62-4.16)   | 0.007 |
| Indication for ERCP - obstructive jaundice                 | 452 (94.8) | 34 (5.2)  | 1                  |       |
| Other indications                                          | 253 (90.4) | 27 (9.6)  | 1.42 (0.35-1.40)   | 0.319 |
| Obstructive jaundice                                       | 467 (93.2) | 34 (6.8)  | 1                  |       |
| Indication for ERCP – altered lab or imaging tests results | 238 (89.8) | 27 (10.2) | 1.56 (0.91-2.64)   | 0.11  |
| Other indications                                          | 422 (93.0) | 32 (7.0)  | 1                  |       |
| Stones                                                     | 283 (90.7) | 29 (9.3)  | 1.35 (0.79-2.19)   | 0.267 |
| ERCP difficulty grade                                      | 447 (93.1) | 33 (6.9)  | 1                  |       |
| I                                                          | 259 (90.6) | 27 (9.4)  | 1.77 (0.95-2.10)   | 0.089 |
| II/III                                                     | 597 (93.3) | 43 (6.7)  | 1                  |       |
| Difficult cannulation                                      | 109 (86.5) | 28 (13.5) | 2.16 (1.08-4.34)   | 0.030 |
| No                                                         | 478 (92.1) | 41 (7.9)  | 1                  |       |
| Yes                                                        | 192 (91.0) | 19 (9.0)  | 1.21 (0.66-1.93)   | 0.665 |
| Sedation technique                                         | 204 (95.8) | 8 (4.2)   | 1                  |       |
| Conscious                                                  | 496 (90.5) | 52 (9.5)  | 2.37 (0.46--12.12) | 0.301 |
| Deep/narcosis (intubation)                                 | 682 (92.7) | 54 (7.3)  | 1                  |       |
| Success in deep cannulation                                |            |           |                    |       |
| Yes                                                        |            |           |                    |       |

## Supplementary material

|                                          |           |          |                     |       |
|------------------------------------------|-----------|----------|---------------------|-------|
| No                                       | 24 (80.0) | 6 (20.0) | 3.16<br>(1.42-7.03) | 0.005 |
| Number of experts as continuous variable |           |          | 1.06<br>(0.85-1.52) | 0.373 |

\*Odds ratios estimated for the parameters of the logistic model adjusted for cluster (hospital) effect.

ERCP, endoscopic retrograde cholangiopancreatography; ASA, American Society of Anesthesiologists;

OR, odds ratio; CI, confidence interval.

## Supplementary material

### CENTER QUESTIONNAIRE

Center: \_\_\_\_\_

Date of compilation: \_\_\_ / \_\_\_ / \_\_\_\_\_

No. of hospital beds: \_\_\_\_\_

Characteristics of the center:

- Gastroenterology Department with beds  Endoscopy Service  Gastroenterology Unit inside a Medical Department  Gastroenterology Unit inside a Surgery Department

Medical Staff (No.): \_\_\_\_\_

ERCP operators (No.): \_\_\_\_\_

Expert ERCP operators (No.): \_\_\_\_\_

ERCP operators who are Gastroenterologists (No.): \_\_\_\_\_

#### **Organization of the unit when performing ERCP**

The ERCP is performed:

- In the context of an Integrated Clinical Pathway of the Hospital  
 After evaluation of the clinical case by the ERCP operator  
 The ERCP is performed upon a request from other specialists

Do you use a specific informed consent module for ERCP?  Yes  No

If yes, is it obtained:

- In the department of origin  Right before the procedure in the ERCP room

Which services are available in your Hospital?:

- US  CT  MR  EUS  PTC

Your Endoscopy Unit guarantees ERCP execution:

- 24-7  
 Everyday, during daytime  
 Only when an endoscopist with experience in ERCP is available  
 Only when the radiology room is available  
 Other: \_\_\_\_\_

Do you have dedicated nurses for ERCP?  Yes  No

Who is your ERCP assistant:  Another physician  A nurse

How many ERCPs were performed in your Center in:

2014: \_\_\_\_\_ 2013: \_\_\_\_\_ 2012: \_\_\_\_\_

Does your Center perform scheduled quality monitoring?:

- Cannulation percentage  
 Adverse events percentage  
 ERCP repetition percentage  
 Other: \_\_\_\_\_  
 No

Where is the ERCP performed?:

- In the endoscopy room, always

## Supplementary material

- In the radiology room, always
- Variable, basing on daytime and conditions of the patient

What type of radiologic equipment do you use?

- Digital C-arm X-ray     Analogic C-arm X-ray     Remotely activated system
- Angiography system

Do you have an archive of the fluoroscopy images?     Yes     No

If yes:  Printed     Digital     Other: \_\_\_\_\_

Is the duration of the X-ray exposition recorded?     Yes     No

How is your patient generally sedated?:

- Conscious sedation (midazolam +/- pethidine)     Deep sedation (propofol)     General Anesthesia

Anesthesiologist attendance:

- An anesthesiologist is always available
- An anesthesiologist is partially available (only for a limited number of hours or days)
- An anesthesiologist is only available for critically ill patients

Patient monitoring:

- Peripheral pulse oximetry     Capnography     Blood pressure     ECG

Patient assistance after the ERCP:

- A recovery room is available
- The patient is sent back to the department of origin immediately after the procedure

Post-ERCP pancreatitis (PEP) prophylaxis:

- Always     Only for high-risk patients     Never

Which drugs do you use for PEP prophylaxis:

- NSAIDS suppository     Gabexate mesilate
- Octreotide     Somatostatin     Other: \_\_\_\_\_

Antibiotic prophylaxis for ERCP:

- Always     Only for selected cases, following guidelines indications     Never

Do you have specific protocols for the management of:

- ERCP preparation (fasting, prophylaxis, etc)
- Antithrombotic therapy
- Follow up and therapy after ERCP
- Adverse events

Amylase/lipase dosing after ERCP:

- Routinely     Only for symptomatic patients
- Timing:  1h     2h     4h     6h     12h     24h

## Supplementary material

### OPERATOR QUESTIONNAIRE

Center: \_\_\_\_\_

Operator No.: \_\_\_\_\_

Date: \_\_\_/\_\_\_/\_\_\_\_\_

Sex:  M  F

Age: \_\_\_\_\_ Year of Degree: \_\_\_\_\_

Role in the unit:

- Head of Department  Attending physician  Contract physician  Resident/fellow  
 Other: \_\_\_\_\_

Education:

- Gastroenterologist  Surgeon  Medicine Specialist  Other: \_\_\_\_\_

Performing ERCP:

- Independently → Fill in section A  
 In training → Fill in section B

#### **SECTION A: EXPERIENCED ERCP OPERATOR**

How many years have you been performing ERCP independently?: \_\_\_\_\_

How old were you when you first performed an ERCP as the first operator?: \_\_\_\_\_

How many ERCPs have you performed as the first operator?:

- <100  100-200  201-300  301-500  501-1000  >1000

How many ERCPs have you performed as the first operator in the last year?:

- <100  100-200  201-300  301-500  501-1000  >1000

Where did you learn to perform ERCP?:

- During residency/fellowship  After residency/fellowship  
 In your Hospital  In a separate ERCP center

How many ERCPs did you perform with supervision before performing ERCP independently?:

- 0 (self-taught)  <50  50-100  101-200  201-300

What's your opinion on the quality of ERCP training programs?:

- There are no training programs, so you have to create your own  
 There are teaching programs, but they are mainly low quality and/or without a hands-on training  
 I had the possibility to train in the context of a dedicated program with good supervisors

What are your performance measures in ERCP?:

- Native-papilla cannulation success:  >90%  80-90%  <80%  
 - PEP rate:  <5%  5-10%  >10%

#### **SECTION B: ERCP TRAINEE**

How long have you been training in ERCP?: \_\_\_\_\_

How old were you when you performed your first ERCP with supervision?: \_\_\_\_\_

How many ERCPs have you performed with supervision?:

- <20  20- 50  51-100  101-200  201-300  301-500  >500

Where are you learning to perform ERCP?:

- Residency/fellowship  After residency/fellowship  
 In my Hospital  In another Hospital



## Supplementary material

What's your opinion on the opportunities for ERCP training?:

- There are no training programs, so you have to create your own
- There are teaching programs, but they are mainly low quality and/or without a hands-on training
- I am attending a dedicated program

What are your performance measures in ERCP?:

- Native-papilla cannulation success:  >90%    80-90%    50-79%    <50%
- PEP rate:  <5%    5-10%    11-20%    >20%

What's your opinion on the quality of your training program?:

- Extremely good, both theory and practice
- I have many opportunities to watch procedures, less opportunities to practice
- Not good, too little opportunities to watch and practice

## Supplementary material

### ERCP CRF

Center: \_\_\_\_\_

Date: \_\_\_/\_\_\_/\_\_\_

First Operator No.: \_\_\_\_\_ Second Operator No.: \_\_\_\_\_

ERCP indication:

- Obstructive jaundice    Acute cholangitis    Blood tests anomalies    Documented CBD stone(s)  
 Acute biliary pancreatitis    Idiopathic/recurrent pancreati    Chronic pancreatitis    Biliary leak  
 SOD    Iatrogenic biliary stenosis  
 Biliary stent replacement/removal    Pancreatic stent replacement/removal  
 Diagnostic ERCP (no definite diagnosis on imaging)    Tissue acquisition    Stenting for a tumor  
 Papillectomy    Other: \_\_\_\_\_

Previous surgery:

- Cholecystectomy    Billroth I    Billroth II  
 GEA    Whipple procedure    Roux-en-Y  
 Other: \_\_\_\_\_

Previous ERCP:    Yes    No

If yes:

- Biliary sphincterotomy already performed    Pancreatic sphincterotomy    Minor papilla sphincterotomy  
 Biliary stent in place    Pancreatic stent in place  
 Other: \_\_\_\_\_

ERCP difficulty:

- Grade 1    Grade 2    Grade 3

ERCP characteristics (Table 1, A-V) which grade difficulty: \_\_\_\_\_

Risk factors:

- Suspected S.O.D.    Female sex    Previous pancreatitis  
 Age < 40    Other: \_\_\_\_\_

Antithrombotic therapy:  Yes    No

ASA score (table 2):    1    2    3    4    5

Investigations performed prior to the ERCP:

- Clinical evaluation/blood tests    Abdominal US    CT scan  
 MRCP    EUS    Other (if relevant): \_\_\_\_\_

Place of execution of the ERCP:

- Endoscopy room    Radiology room    Operating room    Other: \_\_\_\_\_

Sedation:

- Conscious sedation    Deep sedation (propofol)    General anesthesia

Anesthesiologist attendance:  Yes    No

PEP prophylaxis:  Yes    No

If yes:

- Drug: \_\_\_\_\_
- Timing:  Before the ERCP    At the end of the procedure
- Why?:  
 Routine administration    Risk factors present    Long/difficult procedure

Antibiotic prophylaxis:  Yes    No

If yes:

## Supplementary material

- Timing:  Before the ERCP     At the end of the procedure
- Why?:
  - Routine administration
  - Patient characteristics (age, sex, comorbidities)
  - Long/difficult procedure or incomplete drainage

Procedure duration (from scope insertion to scope extraction): \_\_\_\_\_ min

Fluoroscopy duration: \_\_\_\_\_ min

If a trainee was involved, what is the estimated percentage of his/her contribution to the procedure:

- 0%     < 25%     26-50%     51-75%     76-99%     100%

### Procedure success

|    | Task                                                                                                                                                                                                                                                                                                                                                                                                     | Success                  | Partial successo         | Unsuccessful             |
|----|----------------------------------------------------------------------------------------------------------------------------------------------------------------------------------------------------------------------------------------------------------------------------------------------------------------------------------------------------------------------------------------------------------|--------------------------|--------------------------|--------------------------|
| 1  | The duodenum was reached                                                                                                                                                                                                                                                                                                                                                                                 | <input type="checkbox"/> |                          | <input type="checkbox"/> |
| 2  | The papilla was identified                                                                                                                                                                                                                                                                                                                                                                               | <input type="checkbox"/> |                          | <input type="checkbox"/> |
| 3  | CBD deep cannulation<br>Wire-guided sphincterotome<br><input type="checkbox"/> Yes <input type="checkbox"/> No<br>Difficult cannulation:<br>- Precut: <input type="checkbox"/> Yes <input type="checkbox"/> No<br><br>- Trans-pancreatic sphincterotomy:<br><input type="checkbox"/> Yes <input type="checkbox"/> No<br><br>- DGW technique:<br><input type="checkbox"/> Yes <input type="checkbox"/> No | <input type="checkbox"/> |                          | <input type="checkbox"/> |
| 4  | Pancreatic duct cannulation:<br>Desired: <input type="checkbox"/> Yes <input type="checkbox"/> No                                                                                                                                                                                                                                                                                                        | <input type="checkbox"/> |                          | <input type="checkbox"/> |
| 5  | Biliary sphincterotomy                                                                                                                                                                                                                                                                                                                                                                                   | <input type="checkbox"/> |                          | <input type="checkbox"/> |
| 6  | CBD stone extraction <1cm                                                                                                                                                                                                                                                                                                                                                                                | <input type="checkbox"/> | <input type="checkbox"/> | <input type="checkbox"/> |
| 7  | CBD stone extraction >1cm                                                                                                                                                                                                                                                                                                                                                                                | <input type="checkbox"/> | <input type="checkbox"/> | <input type="checkbox"/> |
| 8  | Distal CBD stenting                                                                                                                                                                                                                                                                                                                                                                                      | <input type="checkbox"/> |                          | <input type="checkbox"/> |
| 9  | Hilum stenting                                                                                                                                                                                                                                                                                                                                                                                           | <input type="checkbox"/> | <input type="checkbox"/> | <input type="checkbox"/> |
| 10 | Biliary brushing/biopsy                                                                                                                                                                                                                                                                                                                                                                                  | <input type="checkbox"/> |                          | <input type="checkbox"/> |
| 11 | Pancreatic brushing/biopsy                                                                                                                                                                                                                                                                                                                                                                               | <input type="checkbox"/> |                          | <input type="checkbox"/> |
| 12 | Stricture dilation                                                                                                                                                                                                                                                                                                                                                                                       | <input type="checkbox"/> | <input type="checkbox"/> | <input type="checkbox"/> |
| 13 | Pancreatic sphincterotomy                                                                                                                                                                                                                                                                                                                                                                                | <input type="checkbox"/> |                          | <input type="checkbox"/> |
| 14 | Pancreatic duct stone extraction                                                                                                                                                                                                                                                                                                                                                                         | <input type="checkbox"/> | <input type="checkbox"/> | <input type="checkbox"/> |
| 15 | Therapeutic pancreatic stent                                                                                                                                                                                                                                                                                                                                                                             | <input type="checkbox"/> |                          | <input type="checkbox"/> |
| 16 | Prophylactic pancreatic stent                                                                                                                                                                                                                                                                                                                                                                            | <input type="checkbox"/> |                          | <input type="checkbox"/> |
| 17 | Minor papilla cannulation                                                                                                                                                                                                                                                                                                                                                                                | <input type="checkbox"/> |                          | <input type="checkbox"/> |
| 18 | Minor papilla sphincterotomy                                                                                                                                                                                                                                                                                                                                                                             | <input type="checkbox"/> |                          | <input type="checkbox"/> |
| 19 | Minor papilla stenting                                                                                                                                                                                                                                                                                                                                                                                   | <input type="checkbox"/> |                          | <input type="checkbox"/> |
| 20 | Biliary manometry                                                                                                                                                                                                                                                                                                                                                                                        | <input type="checkbox"/> |                          | <input type="checkbox"/> |

## Supplementary material

|    |                      |                          |  |                          |
|----|----------------------|--------------------------|--|--------------------------|
| 21 | Pancreatic manometry | <input type="checkbox"/> |  | <input type="checkbox"/> |
| 22 | Papillectomy         | <input type="checkbox"/> |  | <input type="checkbox"/> |
| 23 | Other: _____         | <input type="checkbox"/> |  | <input type="checkbox"/> |

### Accessories/devices used:

|    | Accessory/device                                                                                                                                                | Quantity | Non-disposable           | Short-wire               |
|----|-----------------------------------------------------------------------------------------------------------------------------------------------------------------|----------|--------------------------|--------------------------|
| 1  | ERCP catheter                                                                                                                                                   |          | <input type="checkbox"/> | <input type="checkbox"/> |
| 2  | Guidewire                                                                                                                                                       |          | <input type="checkbox"/> | <input type="checkbox"/> |
| 3  | Sphincterotome                                                                                                                                                  |          | <input type="checkbox"/> | <input type="checkbox"/> |
| 4  | Pre-wired sphincterotome                                                                                                                                        |          | <input type="checkbox"/> | <input type="checkbox"/> |
| 5  | Cystotome                                                                                                                                                       |          | <input type="checkbox"/> |                          |
| 6  | Pre-cut needle knife                                                                                                                                            |          | <input type="checkbox"/> | <input type="checkbox"/> |
| 7  | Stone extraction balloon                                                                                                                                        |          | <input type="checkbox"/> | <input type="checkbox"/> |
| 8  | Basket                                                                                                                                                          |          | <input type="checkbox"/> | <input type="checkbox"/> |
| 9  | Lithotripter                                                                                                                                                    |          | <input type="checkbox"/> | <input type="checkbox"/> |
| 10 | Brushing catheter                                                                                                                                               |          | <input type="checkbox"/> | <input type="checkbox"/> |
| 11 | Biliary dilation balloon                                                                                                                                        |          | <input type="checkbox"/> | <input type="checkbox"/> |
| 12 | Inflating device                                                                                                                                                |          |                          |                          |
| 13 | Biliary dilation catheter                                                                                                                                       |          | <input type="checkbox"/> | <input type="checkbox"/> |
| 14 | Pre-mounted biliary plastic stent                                                                                                                               |          |                          | <input type="checkbox"/> |
| 15 | Biliary plastic stent                                                                                                                                           |          |                          | <input type="checkbox"/> |
| 16 | Plastic stent introduction kit                                                                                                                                  |          | <input type="checkbox"/> | <input type="checkbox"/> |
| 17 | Pre-mounted pancreatic plastic stent                                                                                                                            |          | <input type="checkbox"/> | <input type="checkbox"/> |
| 18 | Pancreatic plastic stent                                                                                                                                        |          |                          | <input type="checkbox"/> |
| 19 | Nasobiliary drainage tube                                                                                                                                       |          | <input type="checkbox"/> | <input type="checkbox"/> |
| 20 | Nasopancreatic drainage tube                                                                                                                                    |          | <input type="checkbox"/> | <input type="checkbox"/> |
| 21 | Self-expandable biliary stent<br><br><input type="checkbox"/> Fully covered<br><input type="checkbox"/> Partially covered<br><input type="checkbox"/> Uncovered |          |                          |                          |
| 22 | Self-expandable pancreatic stent                                                                                                                                |          |                          | <input type="checkbox"/> |
| 23 | Biopsy forceps                                                                                                                                                  |          | <input type="checkbox"/> | <input type="checkbox"/> |
| 24 | Cholangioscopy                                                                                                                                                  |          |                          |                          |
| 25 | Other: _____                                                                                                                                                    |          |                          |                          |

## Supplementary material

### DEFINITIONS

#### 1. ERCP difficulty grade

|                                | Diagnostic                                                                | Therapeutic                                                                                                                                       |
|--------------------------------|---------------------------------------------------------------------------|---------------------------------------------------------------------------------------------------------------------------------------------------|
| <b>Grade 1: standard</b>       | A. Selective deep cannulation<br>B. Biopsy and citology                   | C. Biliary sphincterotomy<br>D. Stones <1cm<br>E. Stents for biliary leaks<br>F. Stents for low tumors<br>G. Prophylactic small pancreatic stents |
| <b>Grade 2: advanced</b>       | H. Billroth II diagnostics<br>I. Minor papilla cannulation                | L. Stones >1cm<br>M. Hilar tumor stent<br>N. Benign biliary stricture                                                                             |
| <b>Grade 3: tertiary level</b> | O. Sphincter manometry<br>P. Whipple/Roux-en-Y<br>Q. Intraductalendoscopy | R. Billroth II therapeutics<br>S. Intrahepatic stones<br>T. Pancreatic therapies<br>U. Ampullectomy<br>V. Pseudocyst drainage                     |

#### 2. ASA score

| ASA score | Definition                                                                                                                                                                                                                                                                                                                                                                                                       |
|-----------|------------------------------------------------------------------------------------------------------------------------------------------------------------------------------------------------------------------------------------------------------------------------------------------------------------------------------------------------------------------------------------------------------------------|
| 1         | A normal healthy patient<br><br>Examples: Healthy, non-smoking, no or minimal alcohol use                                                                                                                                                                                                                                                                                                                        |
| 2         | A patient with mild systemic disease<br><br>Examples: Mild diseases only without substantive functional limitations. Current smoker, social alcohol drinker, pregnancy, obesity (30<BMI<40), well-controlled DM/HTN, mild lung disease                                                                                                                                                                           |
| 3         | A patient with severe systemic disease<br><br>Examples: Substantive functional limitations; One or more moderate to severe diseases; Poorly controlled DM or HTN, COPD, morbid obesity (BMI ≥40), active hepatitis, alcohol dependence or abuse, implanted pacemaker, moderate reduction of ejection fraction, ESRD undergoing regularly scheduled dialysis, history (>3 months) of MI, CVA, TIA, or CAD/stents. |
| 4         | A patient with severe systemic disease that is a constant threat to life<br><br>Examples: Recent (<3 months) MI, CVA, TIA or CAD/stents, ongoing cardiac ischemia or severe valve dysfunction, severe reduction of ejection fraction, shock, sepsis, DIC,                                                                                                                                                        |

## Supplementary material

|   |                                                                                                                                           |
|---|-------------------------------------------------------------------------------------------------------------------------------------------|
|   | ARD or ESRD not undergoing regularly scheduled dialysis                                                                                   |
| 5 | A moribund patient who is not expected to survive without the operation<br>Examples: Ruptured abdominal/thoracic aneurysm, massive trauma |

## Supplementary material

### ADVERSE EVENT(S) CRF

Center: \_\_\_\_\_

ERCP Operator No.: \_\_\_\_\_

AE date: \_\_\_/\_\_\_/\_\_\_

ERCP date: \_\_\_/\_\_\_/\_\_\_

AEs (always evaluate one week after the procedure to define severity)

|   | AE                               | Mild                     | Moderate                 | Severe or fatal          |
|---|----------------------------------|--------------------------|--------------------------|--------------------------|
| 1 | Acute pancreatitis               | <input type="checkbox"/> | <input type="checkbox"/> | <input type="checkbox"/> |
| 2 | Bleeding                         | <input type="checkbox"/> | <input type="checkbox"/> | <input type="checkbox"/> |
| 3 | Cholangitis                      | <input type="checkbox"/> | <input type="checkbox"/> | <input type="checkbox"/> |
| 4 | Perforation after sphincterotomy | <input type="checkbox"/> | <input type="checkbox"/> | <input type="checkbox"/> |
| 5 | Duodenal wall perforation        | <input type="checkbox"/> | <input type="checkbox"/> | <input type="checkbox"/> |
| 6 | Cardiopulmonary AE               | <input type="checkbox"/> | <input type="checkbox"/> | <input type="checkbox"/> |
| 7 | Other:<br>_____                  | <input type="checkbox"/> | <input type="checkbox"/> | <input type="checkbox"/> |

### DEFINITIONS

#### - AE definition

| AE                                                                                                                                         | Mild                                                                                                                        | Moderate                                                                               | Severe                                                                                              |
|--------------------------------------------------------------------------------------------------------------------------------------------|-----------------------------------------------------------------------------------------------------------------------------|----------------------------------------------------------------------------------------|-----------------------------------------------------------------------------------------------------|
| <b>Bleeding</b>                                                                                                                            | Clinically defined (not only endoscopically). Hb drop <3g; Transfusions not necessary                                       | Transfusion of $\leq 4$ units of pRBC. Angiography or surgical intervention not needed | Transfusion of $\geq 5$ units of pRBC or angiography or surgery                                     |
| <b>Perforation</b>                                                                                                                         | Possible or mild leak of liquid or contrast; conservative management $\leq 3$ days                                          | Definite perforation, conservative management, 4-10 days                               | Medical therapy >10 days or percutaneous treatment or surgery                                       |
| <b>Acute pancreatitis</b>                                                                                                                  | Abdominal pain, amylase /lipase x3 which normalize within 24 h. Hospitalization or 2-3 days prolongation of hospitalization | 4-10 days hospitalization                                                              | Hospitalization >10 days or necrotic pancreatitis, pseudocyst, surgery or percutaneous intervention |
| <b>Infection (cholangitis)</b>                                                                                                             | >38°C for 24-48 h                                                                                                           | Sepsis and >3 days hospitalization or percutaneous or endoscopic intervention          | Septic shock or need of surgery                                                                     |
| <b>Basket impaction</b>                                                                                                                    | Basket freed spontaneously or by endoscopic intervention                                                                    | Percutaneous intervention needed                                                       | Need of surgery                                                                                     |
| Gravity is defined by length of hospitalization: < 3 days: mild; 4-9 days: moderate; 10 days or any ICU hospitalization or surgery: severe |                                                                                                                             |                                                                                        |                                                                                                     |

## Supplementary material

### OUTCOME CRF

Center: \_\_\_\_\_

Operator No.: \_\_\_\_\_

Date of ERCP: \_\_\_/\_\_\_/\_\_\_

Date of outcome: \_\_\_/\_\_\_/\_\_\_

1-month outcome:

- Patient is asymptomatic:  Yes  No
- ERCP was repeated:  Yes  No

If yes:

Management of sequelae of the procedure: (specify) \_\_\_\_\_

Recurrent disease

No. of repeated ERCPs: \_\_\_\_\_

- A new hospital admission was required:  Yes  No

If yes:

For ERCP AEs

For the management of recurrent disease

For ERCP-unrelated causes

- Need of surgery:  Yes  No
- Patient died:  Yes  No
